# Supplementary material for: Restructuring highly electron-deficient metal-metal oxides for boosting stability in acidic oxygen evolution reaction
Source: PubMed Central journal article supplement (PMC8479065; doi:10.1038/s41467-021-26025-0), 2021-09-28
Supplement: 41467_2021_26025_MOESM1_ESM.pdf [file 41467_2021_26025_MOESM1_ESM.pdf]

Supporting information

**Restructuring highly electron-deficient metal-metal oxides for boosting stability in acidic oxygen evolution reaction**

Xinghui Liu<sup>1,2</sup>, Shibo Xi<sup>3</sup>, Hyunwoo Kim<sup>4</sup>, Ashwani Kumar<sup>1,2</sup>, Jinsun Lee<sup>1,2</sup>, Jian Wang<sup>5</sup>, Ngoc Quang Tran<sup>1</sup>, Taehun Yang<sup>1,2</sup>, Xiaodong Shao,<sup>1,2</sup> Mengfang Liang<sup>1,2</sup>, Min Gyu Kim<sup>6</sup>, Hyoyoung Lee<sup>1,2,7\*</sup>

<sup>1</sup>Center for Integrated Nanostructure Physics (CINAP), Institute of Basic Science (IBS), 2066 Seoburo, Jangan-Gu, Suwon 16419, Republic of Korea.

<sup>2</sup>Department of Chemistry, Sungkyunkwan University (SKKU), 2066 Seoburo, Jangan-Gu, Suwon 16419, Republic of Korea.

<sup>3</sup>Institute of Chemical and Engineering Sciences, A\*STAR, 1 Pesek Road, Jurong Island, 627833, Singapore.

<sup>4</sup>Department of Energy Science, Sungkyunkwan University (SKKU), 2066 Seoburo, Jangan-Gu, Suwon 16419, Republic of Korea.

<sup>5</sup>Department of Chemistry, College of Science, Seoul National University, Seoul, 08826, Republic of Korea.

<sup>6</sup>Beamline Research Division, Pohang Accelerator Laboratory (PAL), Pohang University of Science and Technology, Pohang 37673, Republic of Korea.

<sup>7</sup>Department of Biophysics, Sungkyunkwan University (SKKU), 2066 Seoburo, Jangan-Gu, Suwon 16419, Republic of Korea.

\*Corresponding author. Email: [hyoyoung@skku.edu](mailto:hyoyoung@skku.edu) (H.L.)

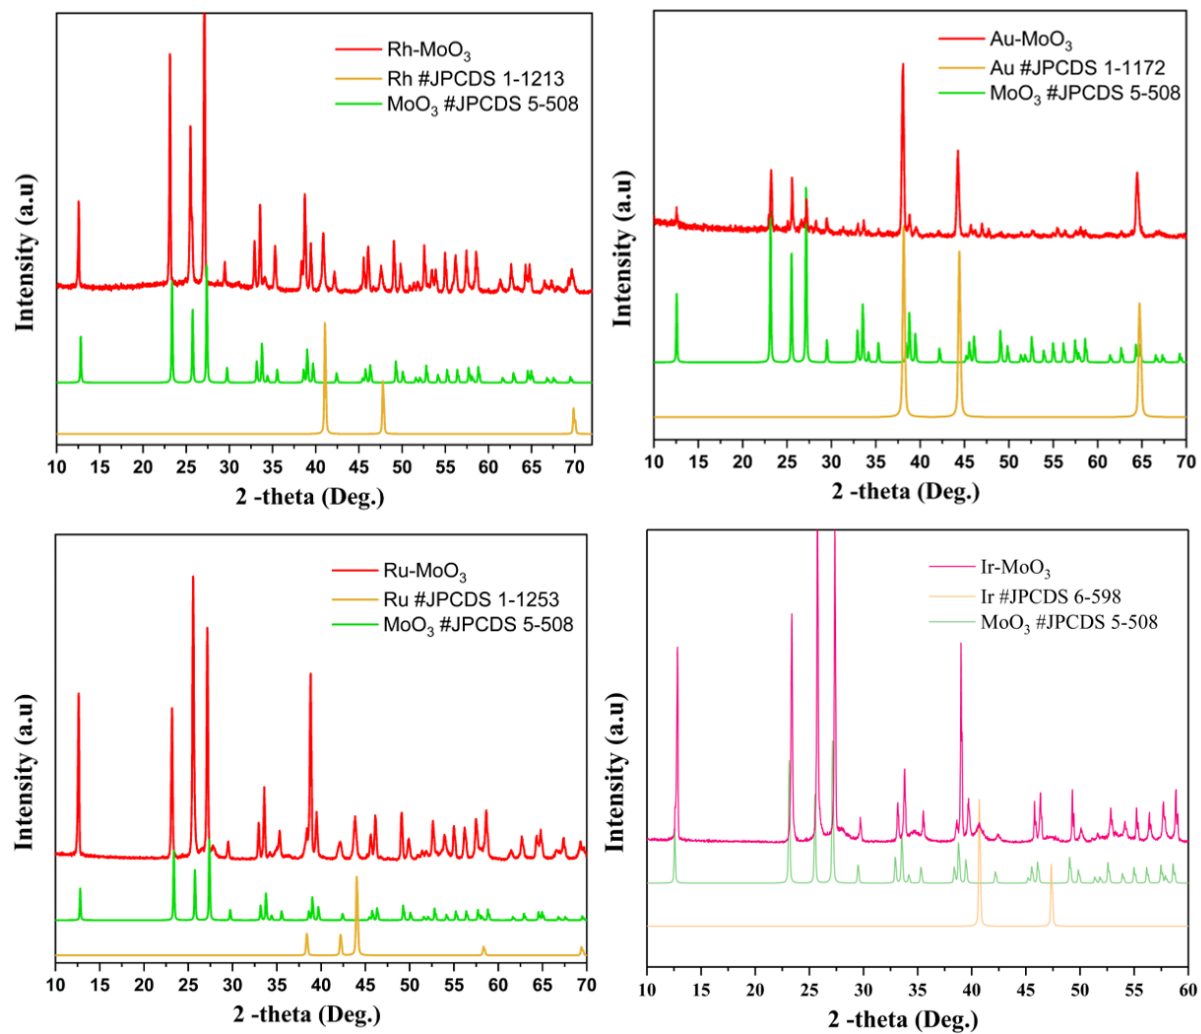

**Figure S1. XRD pattern of the as-prepared metal-semiconductor nanocomposite.**

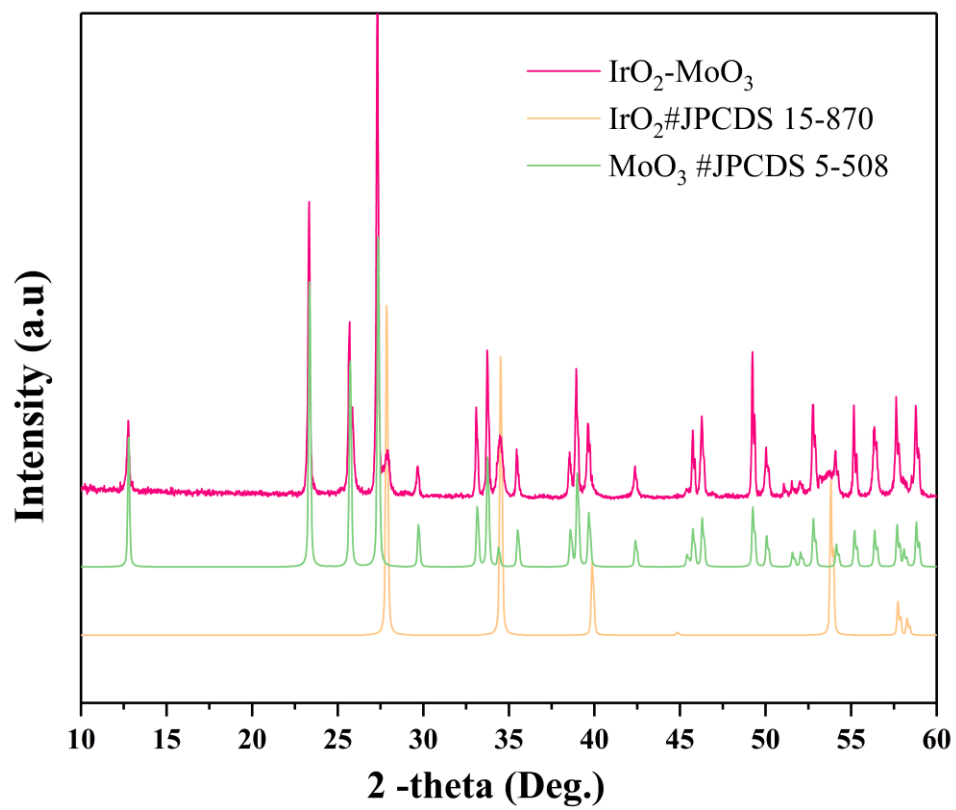

Figure S2. XRD pattern of  $\text{IrO}_2\text{-MoO}_3$ .

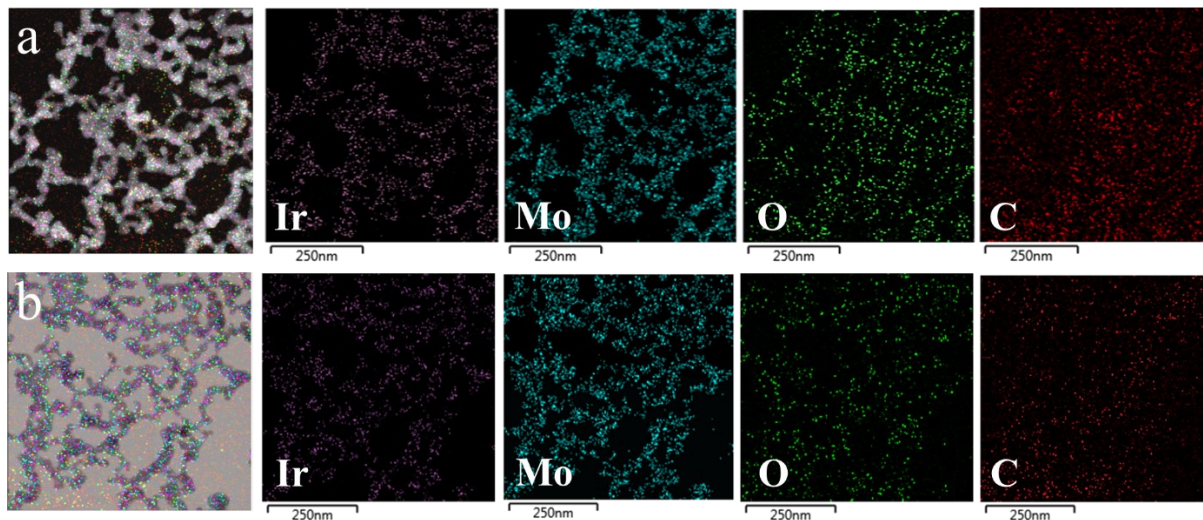

**Figure S3, Structural characterization and elemental maps (Ir, Mo, O, C) of IMO. a**, the high-angle annular dark-field scanning transmission electron microscopy energy-dispersive X-ray spectroscopy (HAADF-STEM-EDS). **b**, the annular bright-field scanning transmission electron microscopy energy-dispersive X-ray spectroscopy (ABF-STEM-EDS) elemental mapping images.

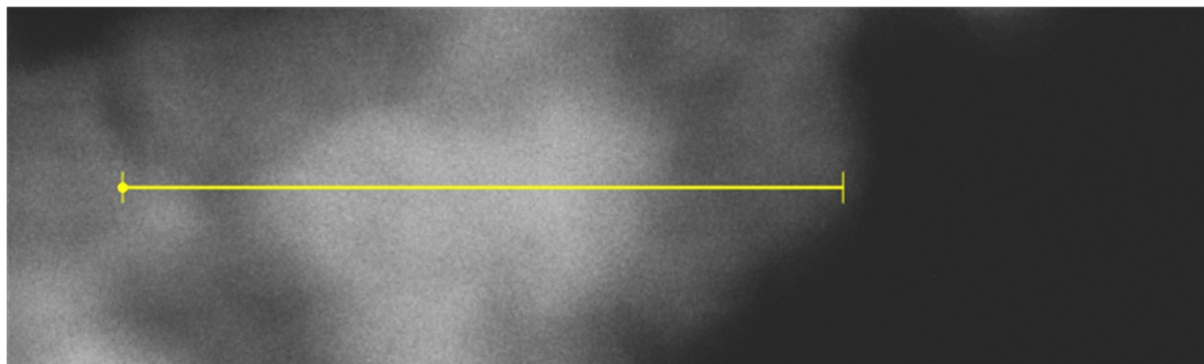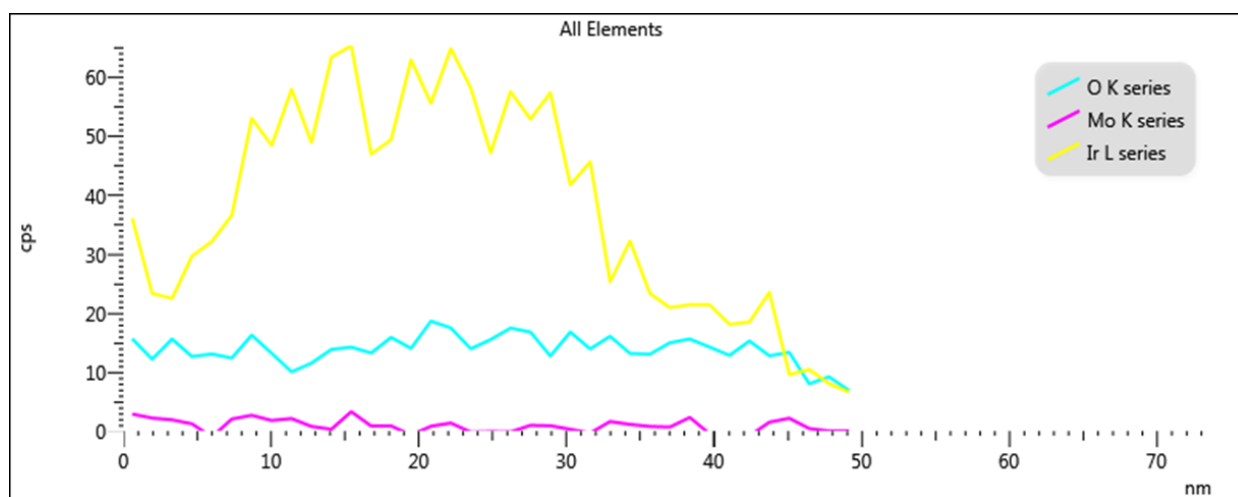

**Figure S4. Line EDS mapping of IMO of Figures 2d and 2e.**

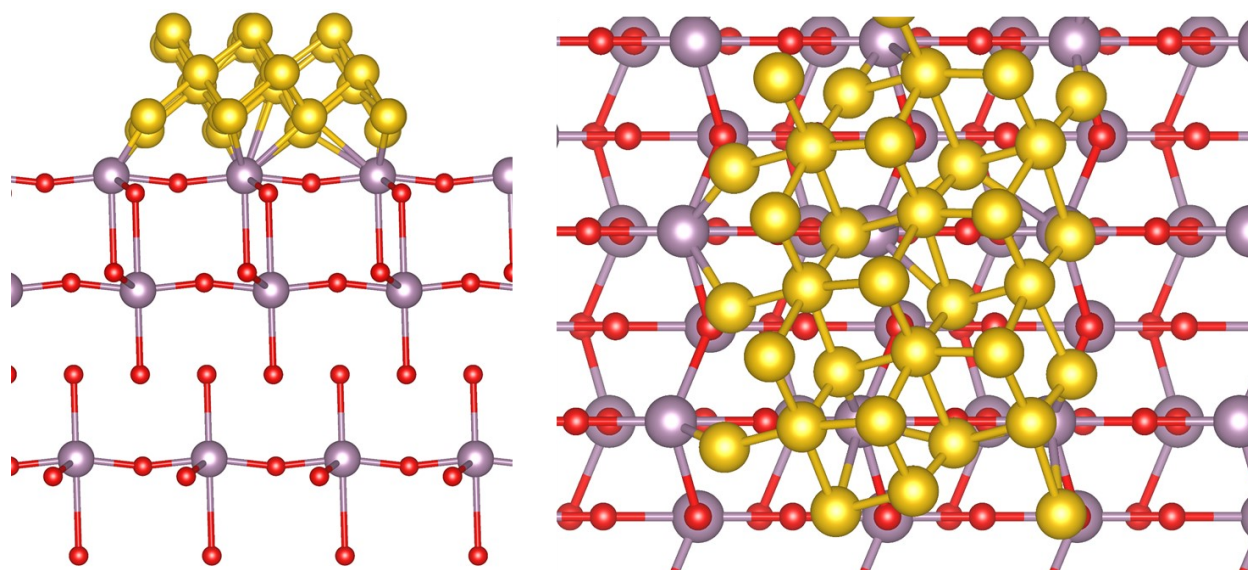

**Figure S5.** The side view of (left) and top view (right) of the structural model. Color code: Mo (purple), O (red), Ir (yellow).

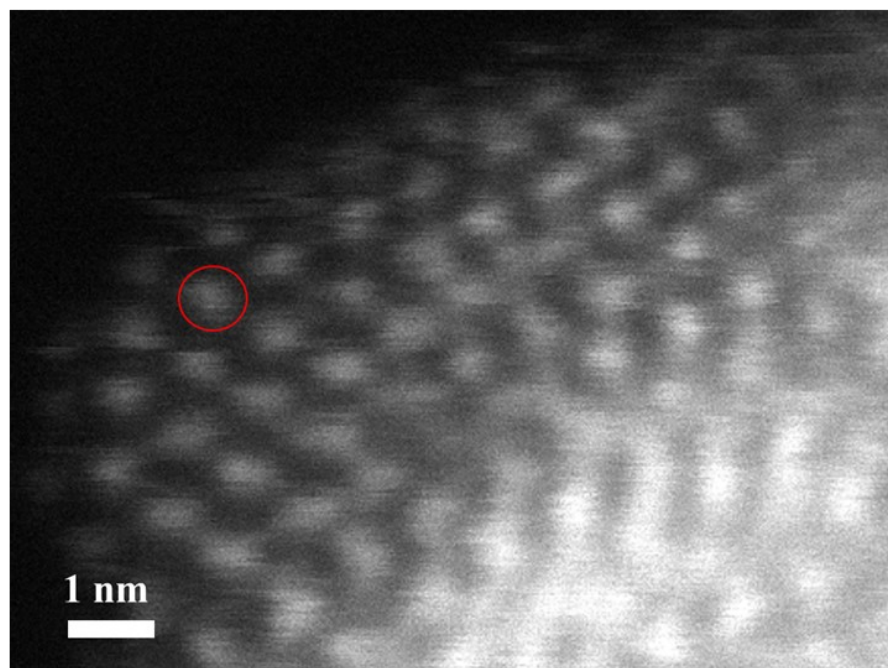

**Figure S6. HAADF-STEM image of Ir metal in IMO.** The bright points are Ir atoms.

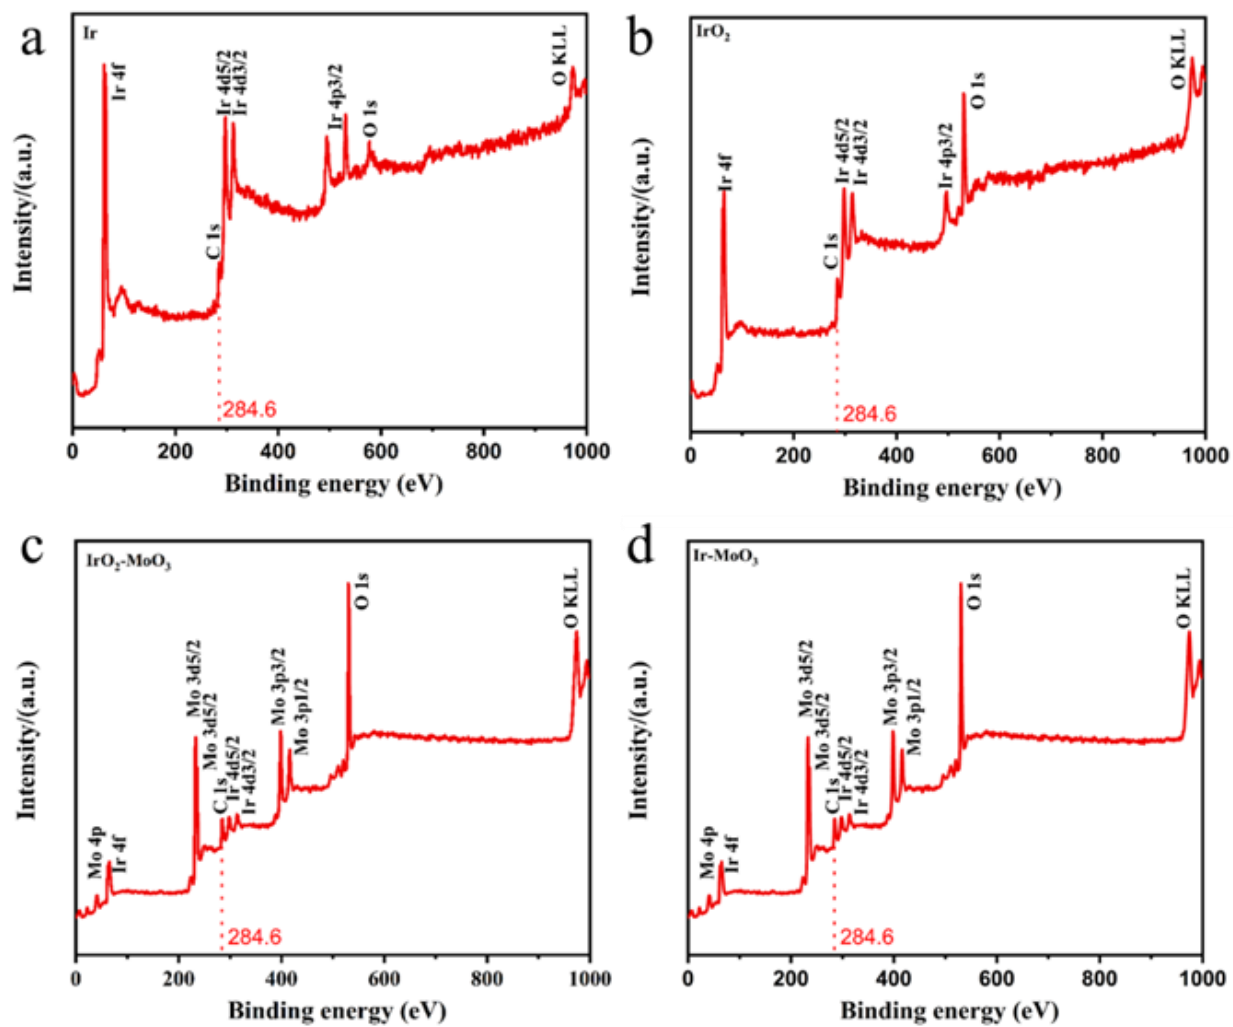

**Figure S7.** The survey spectrum with energy calibration using C 1s at 284.6 eV. **a,** Commercial Ir. **b,** Commercial IrO<sub>2</sub>. **c,** IrO<sub>2</sub>-MoO<sub>3</sub>. **d,** Ir-MoO<sub>3</sub>.



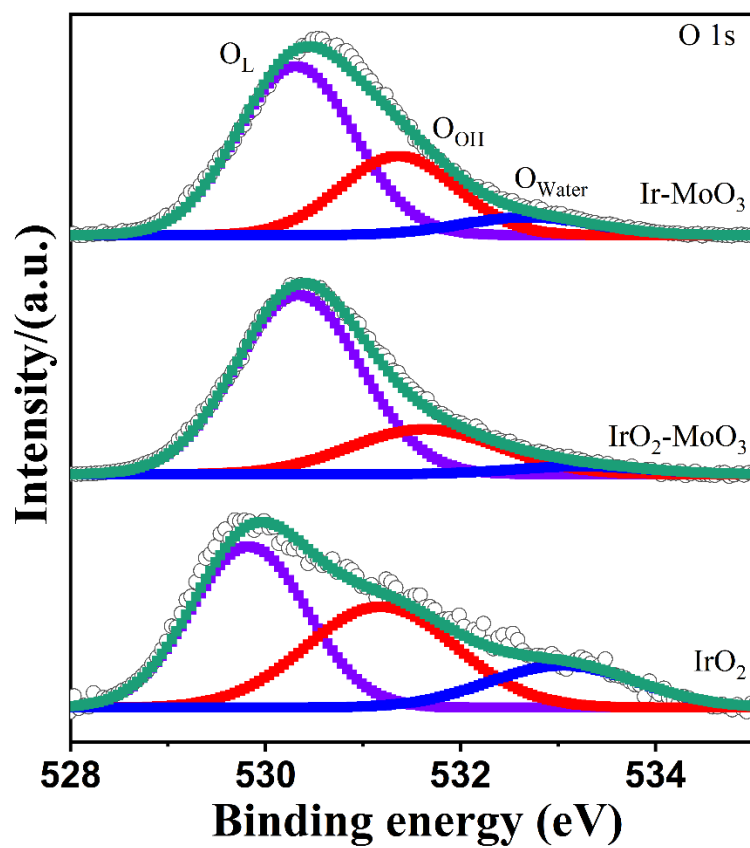

**Figure S8.** HR-XPS of O 1s for commercial IrO<sub>2</sub>, IOMO, and IMO. Where O<sub>L</sub> is lattice oxygen, O<sub>OH</sub> is adsorbed hydroxide, and O<sub>Water</sub> is adsorbed water.

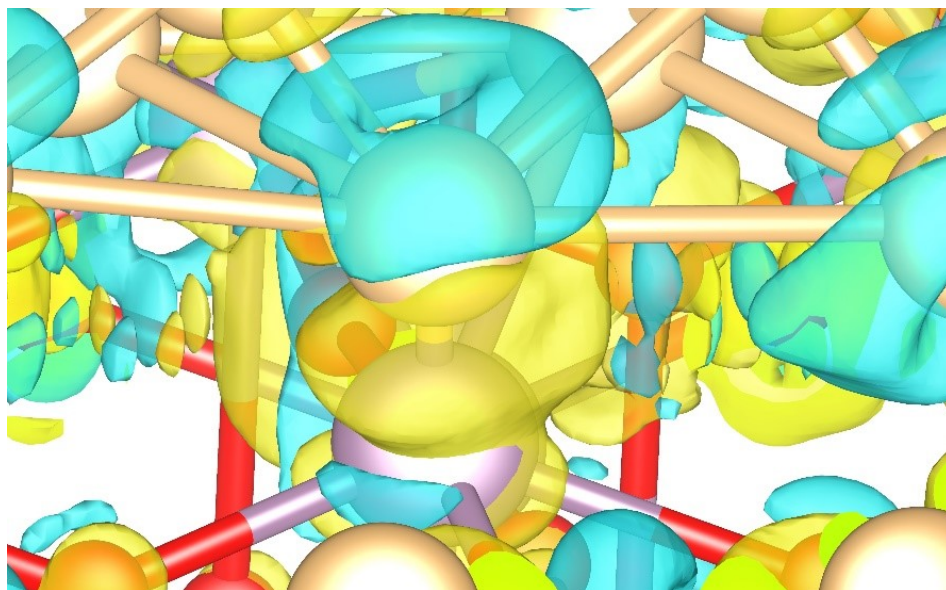

**Figure S9. The other enlarger charge density difference images of IMO.** The yellow and cyan regions represent electron accumulation and depletion. The red, gold, and violet balls represent the O, Ir, and Mo atoms, respectively. The isosurface value is 0.015e/bohr<sup>3</sup>.

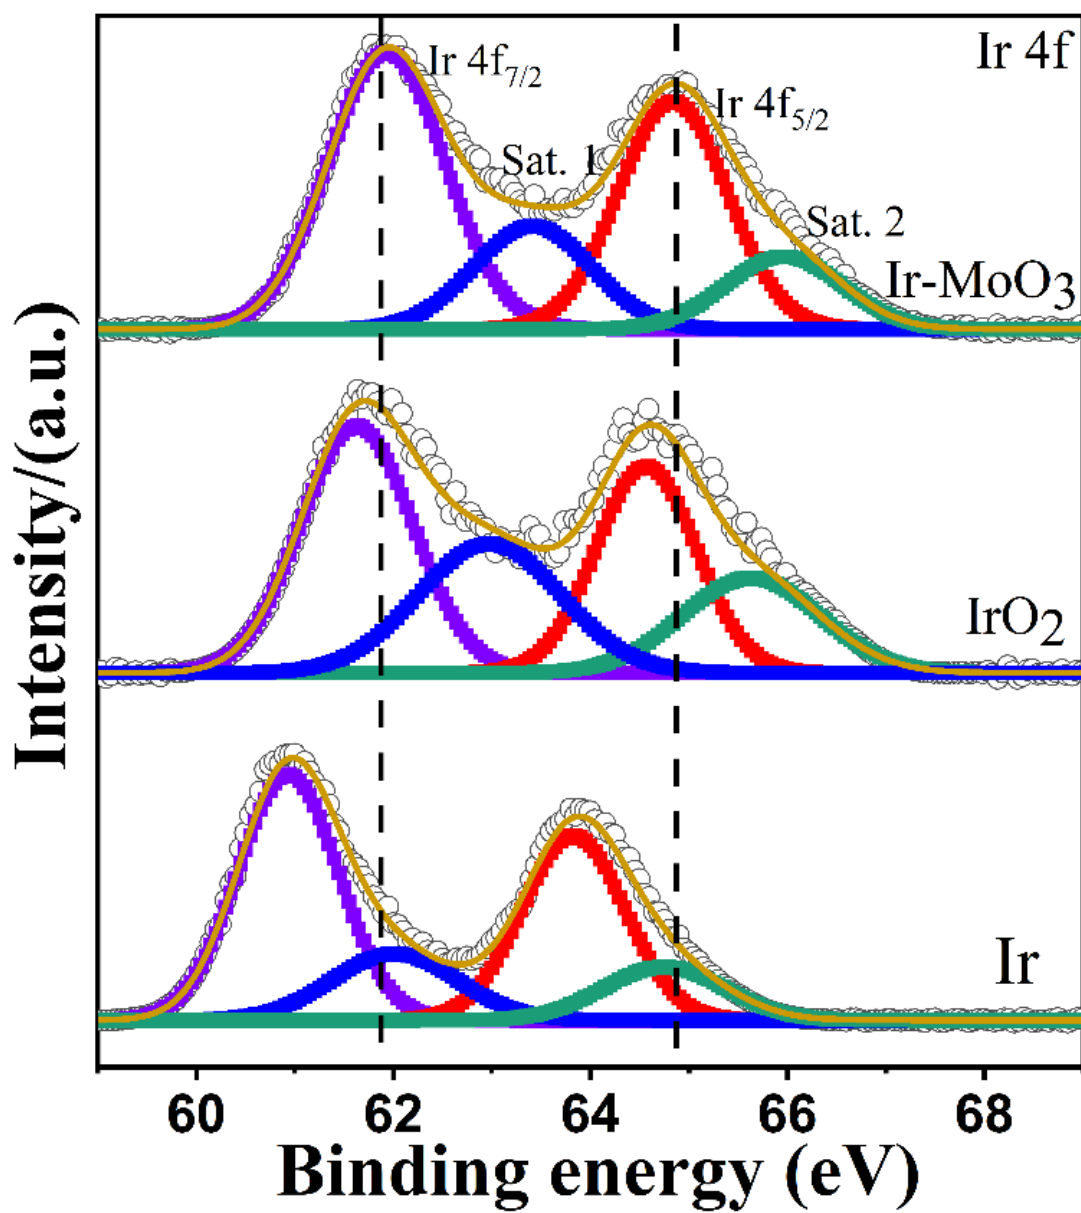

Figure S10. HR-XPS of Ir 4f for commercial Ir, IrO<sub>2</sub>, and IMO.

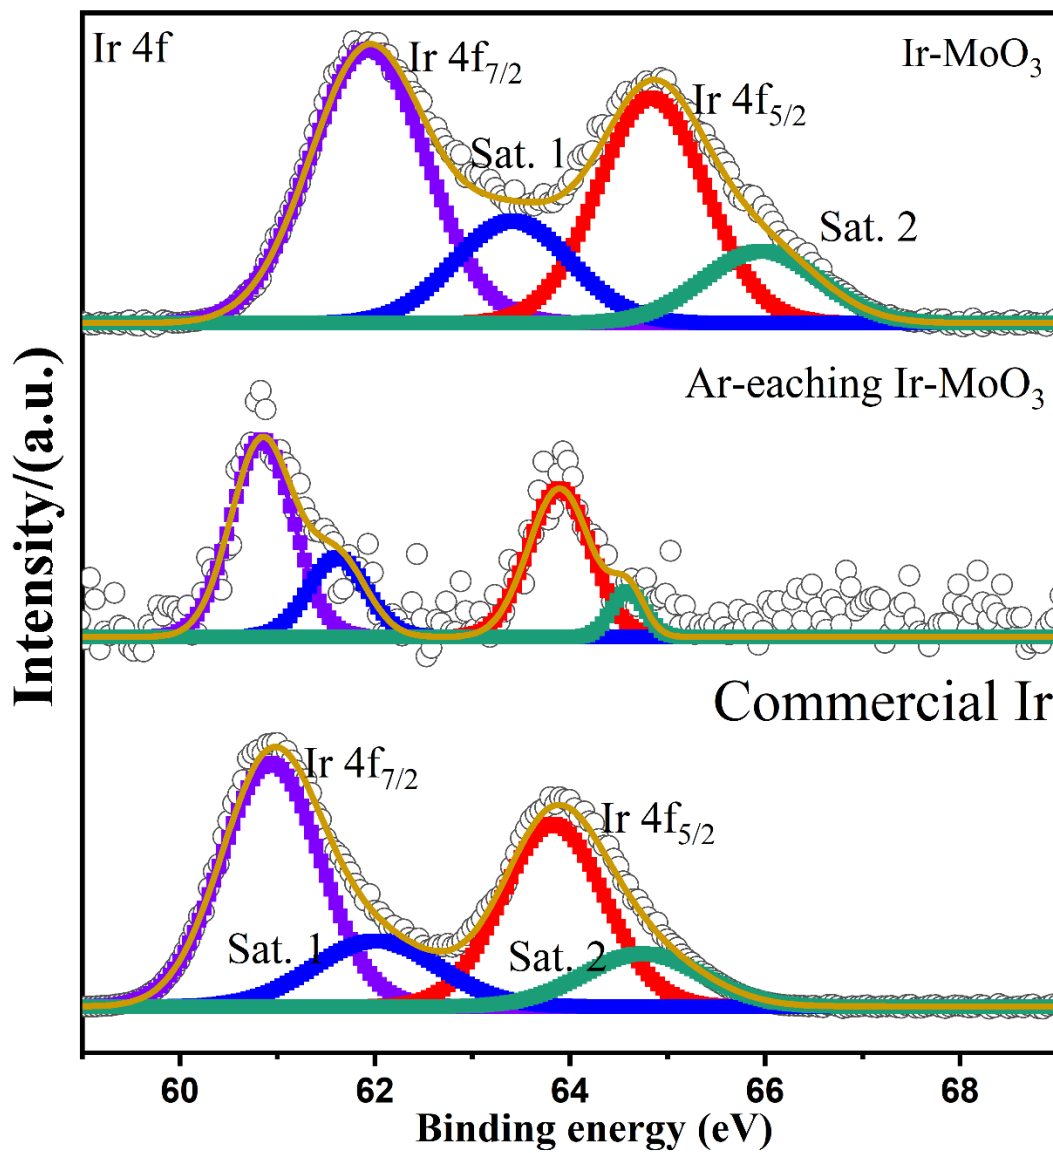

Figure S11 HR-XPS of Ir 4f for the Commercial Ir, IMO, and argon (Ar) etching IMO.

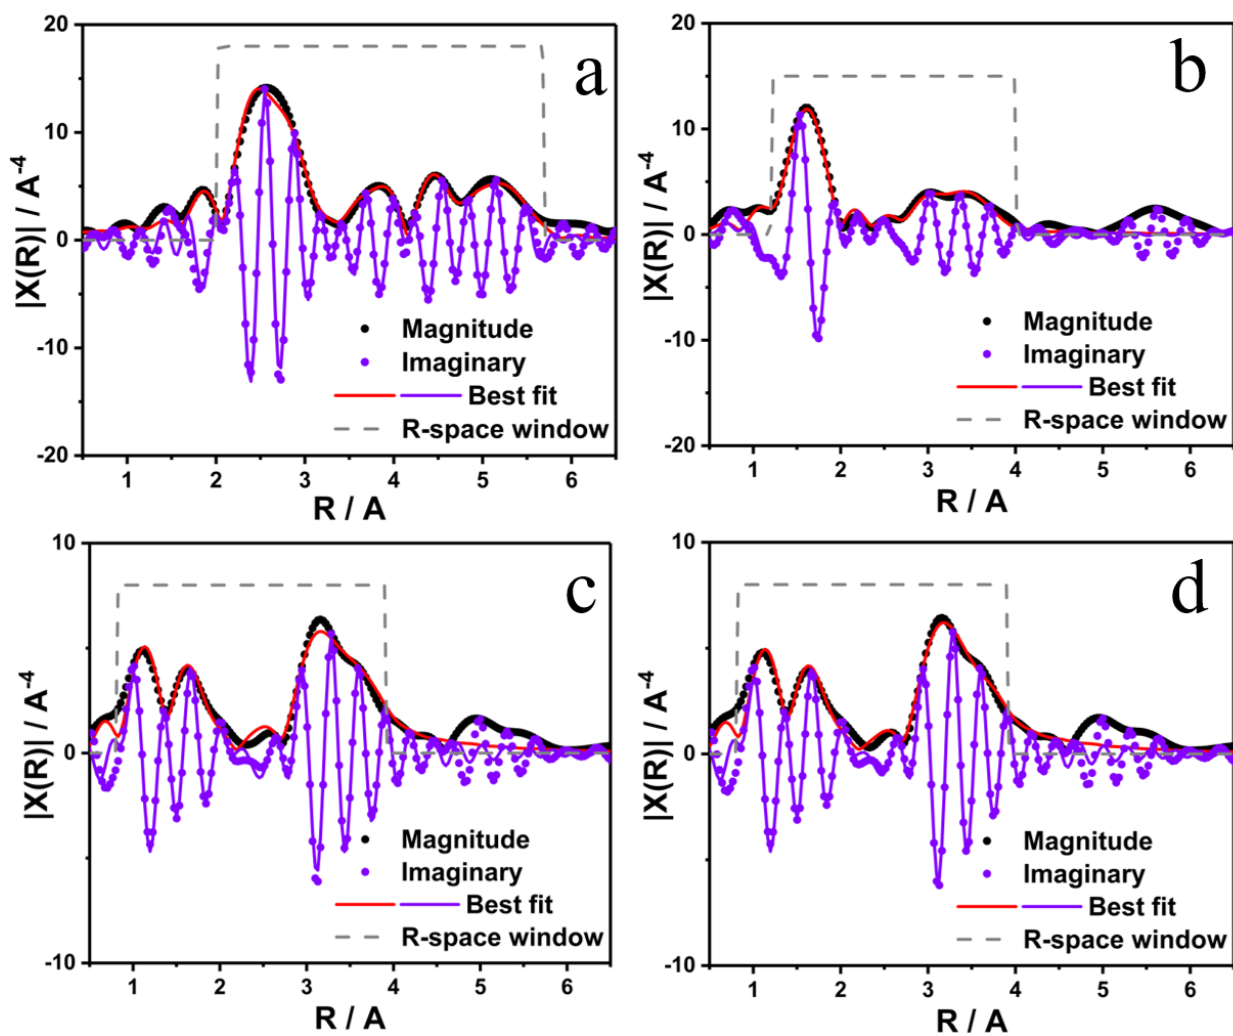

**Figure S12.** **a**, EXAFS fitting curve for Ir in IMO; **b**, EXAFS fitting curve for Ir in IOMO; **c**, EXAFS fitting curve for Mo in IMO; **d**, EXAFS fitting curve for Mo in IOMO.

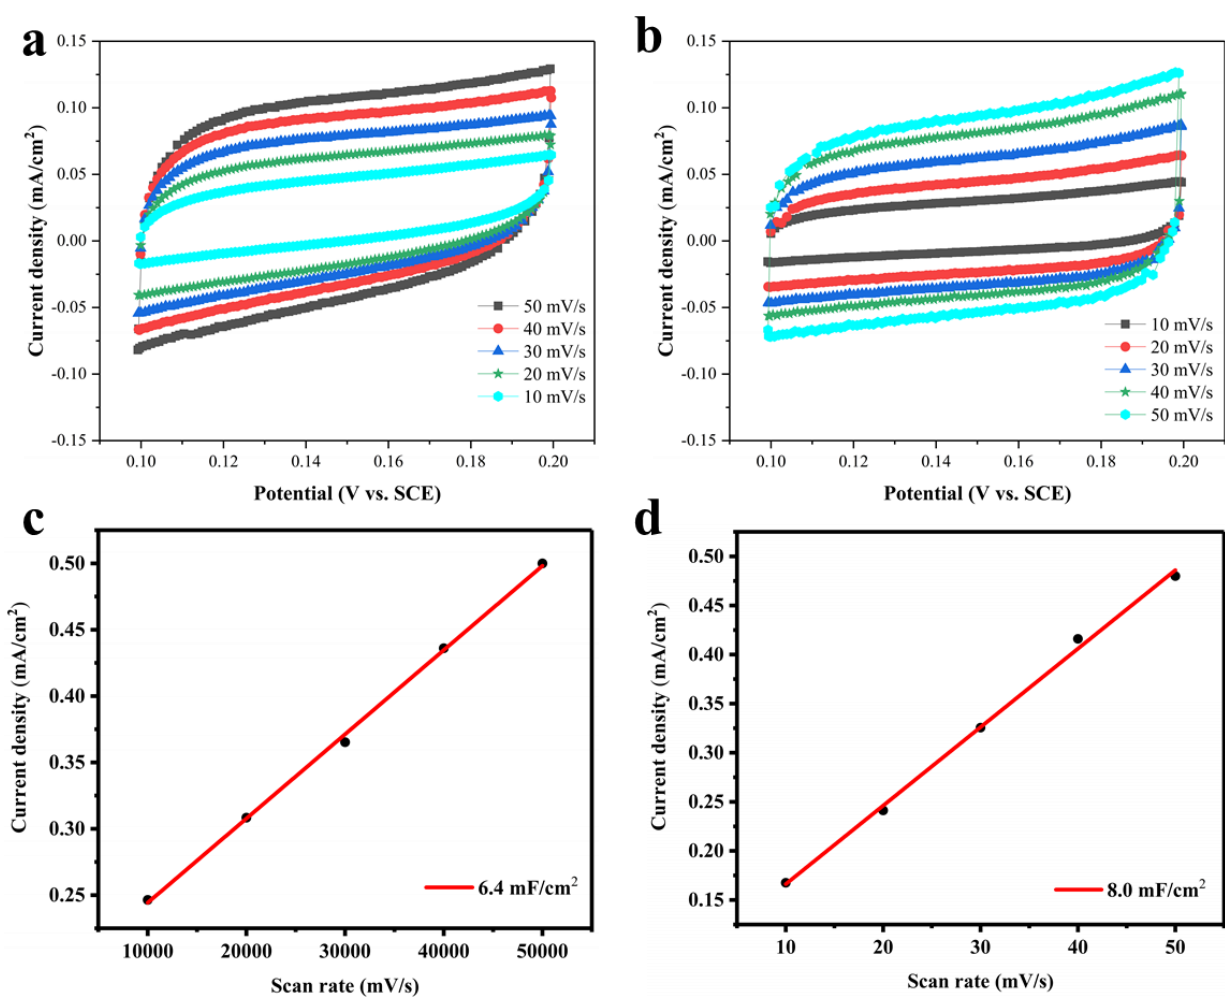

**Figure S13.** **a**, Cyclic voltammograms of IOMO acquired at the scan rates of 10 mV to 50 mV per second. **b**, Cyclic voltammograms of IMO acquired at the scan rates of 10 mV to 50 mV per second. **c**, The corresponding plot for estimating  $C_{DL}$  of IOMO **d**, The corresponding plot for estimating  $C_{DL}$  of IMO.

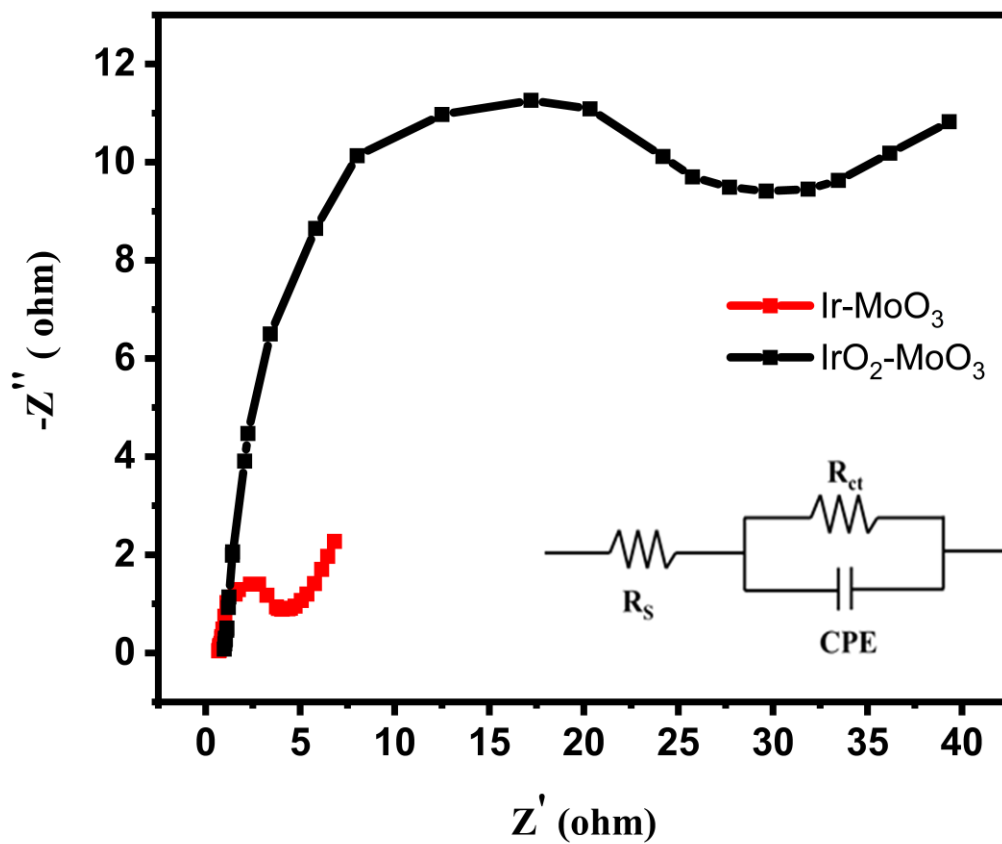

Figure S14. Nyquist plots of IMO and IOMO acquired using the overpotential of 110 mV.

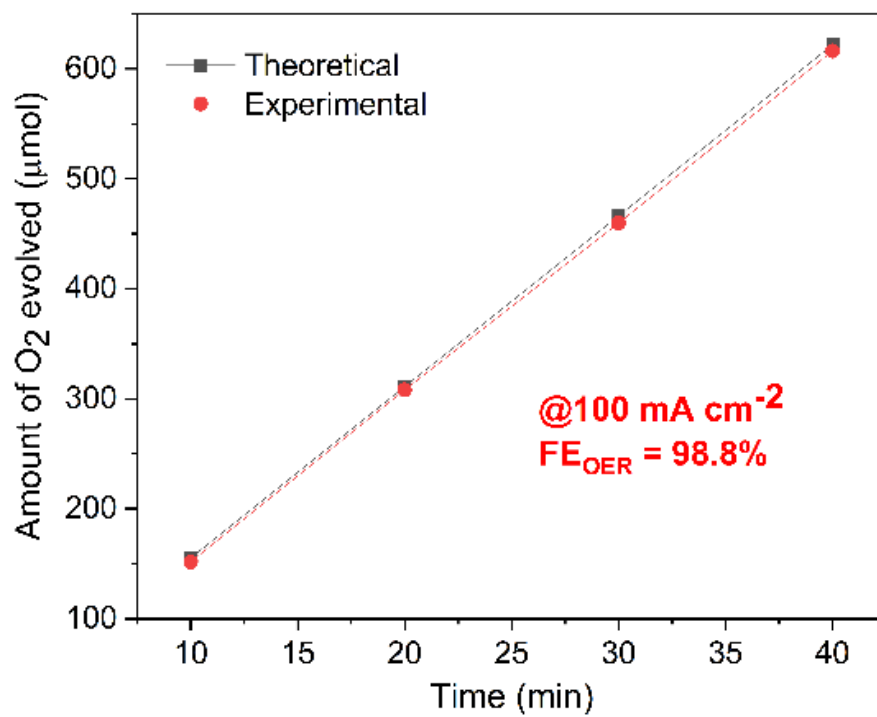

**Figure S15. Faradaic efficiency of the IMO electrode** showing the amounts of theoretically calculated and experimentally measured O<sub>2</sub> gas over time in 0.5 M H<sub>2</sub>SO<sub>4</sub> at current density of 100 mA cm<sup>-2</sup>.



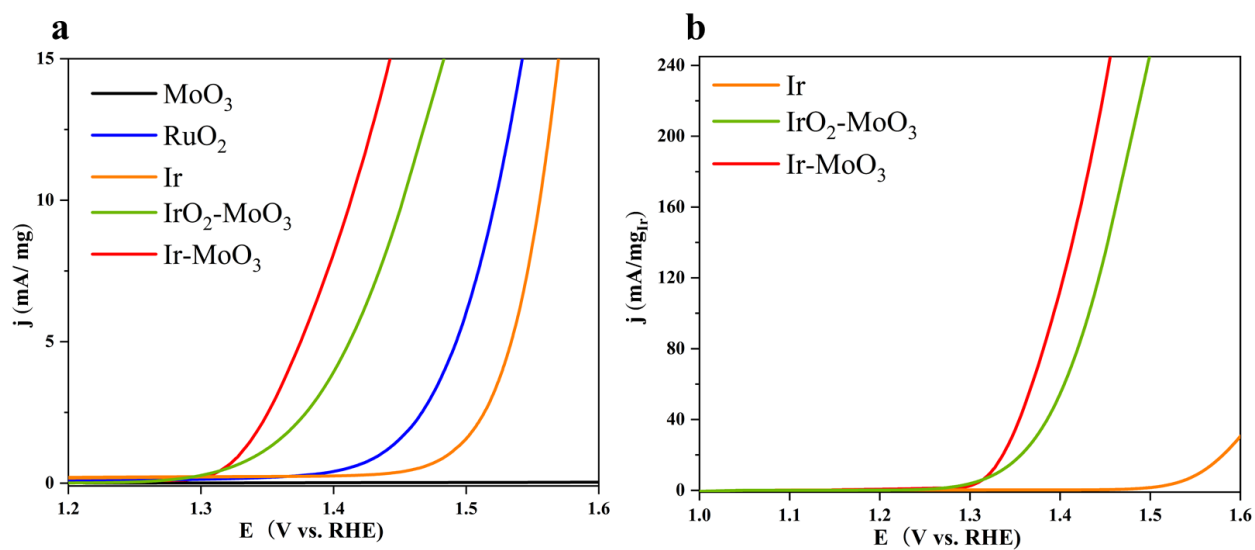

**Figure S16. a**, The mass activity of as-prepared electrodes normalizing by total loading of catalyst.  
**b**, The mass activity of as-prepared electrodes normalizing by loading of Ir.

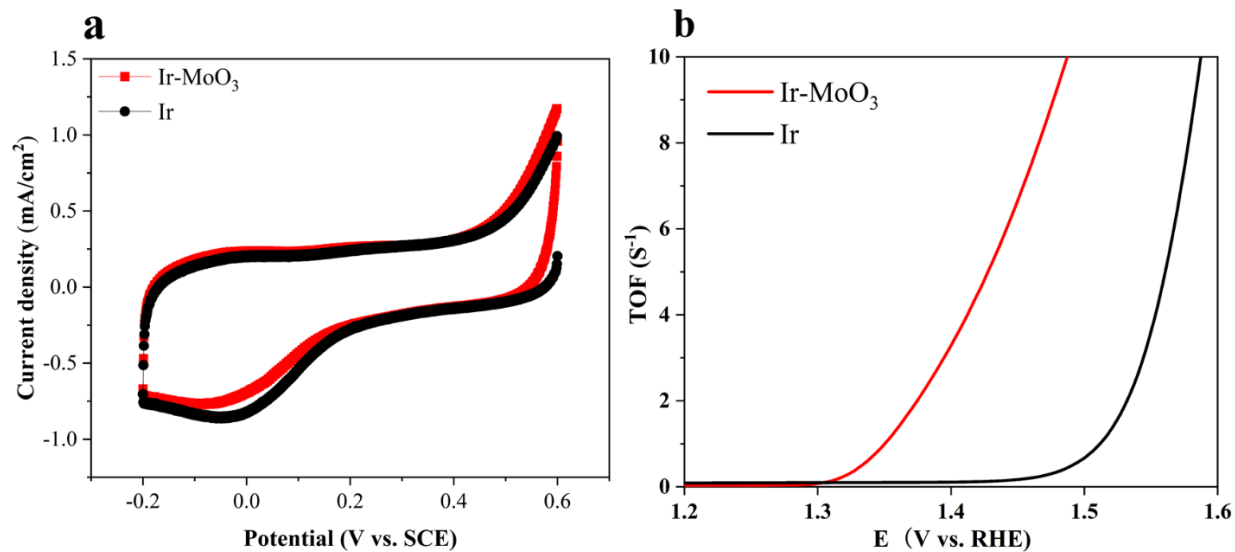

**Figure S17. a**, the CV curve of IMO and It at a scan rate of 50 mV s<sup>-1</sup> in PBS solution (pH = 7.4).  
**b**, the TOFs of the IMO and Pt in 0.5 M H<sub>2</sub>SO<sub>4</sub>.

### For turnover frequency (TOF) calculation:

The upper limit of the number of active site ( $N$ ) was first determined by measuring CV curves in 1 mol phosphoric acid buffer (PBS) (pH = 7.4) at a scan rate of  $50 \text{ mV s}^{-1}$ .<sup>1</sup> The  $N$  (mol) and TOF ( $\text{s}^{-1}$ ) were calculated with the following equations:

$$N = \frac{Q}{2F}$$

$$TOF = \frac{I}{2NF}$$

where  $Q$  (C) is the number of voltammetric charge,  $F$  is the Faraday constant ( $96485.3329 \text{ C mol}^{-1}$ ), and  $I$  (A) is the current obtained from the LSV polarization curve.

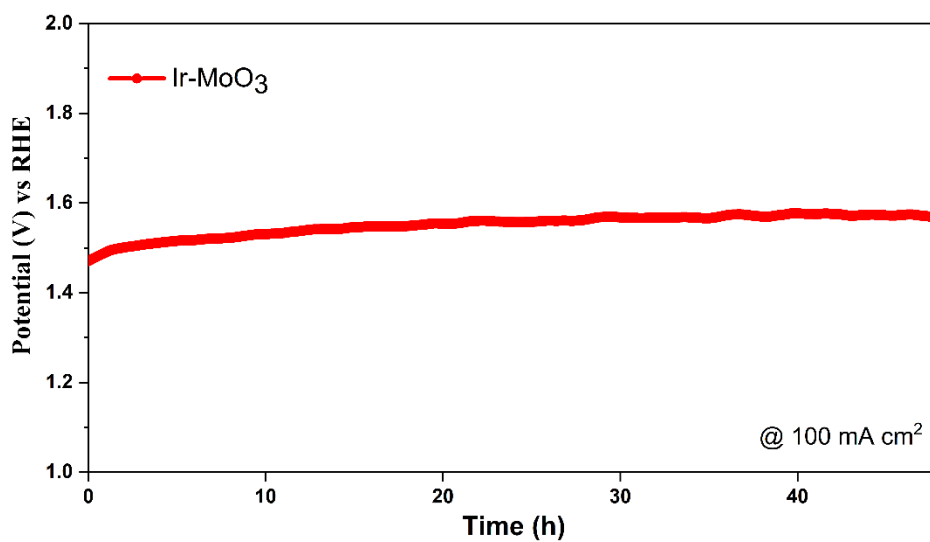

**Figure S18. Chronopotentiometric curves of Ir-MoO<sub>3</sub> at a current density of  $100 \text{ mA cm}^{-2}$ .**

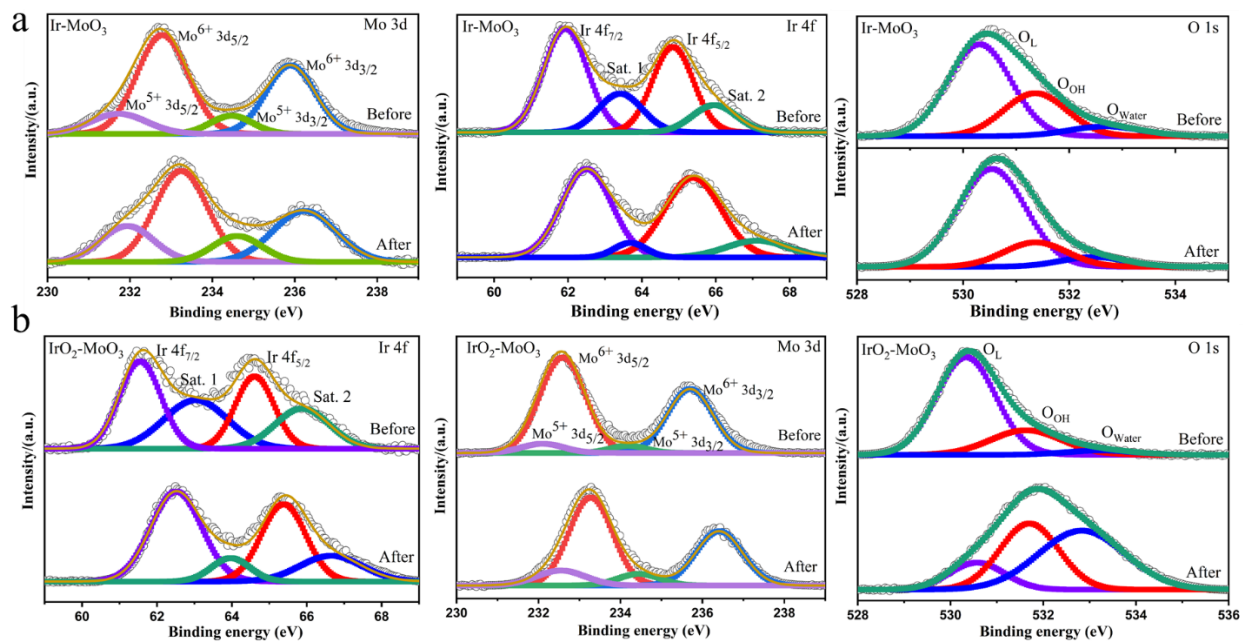

**Figure S19.** XPS patterns for before and after the OER stability measurement. **a**, IMO and **b**, IOMO.

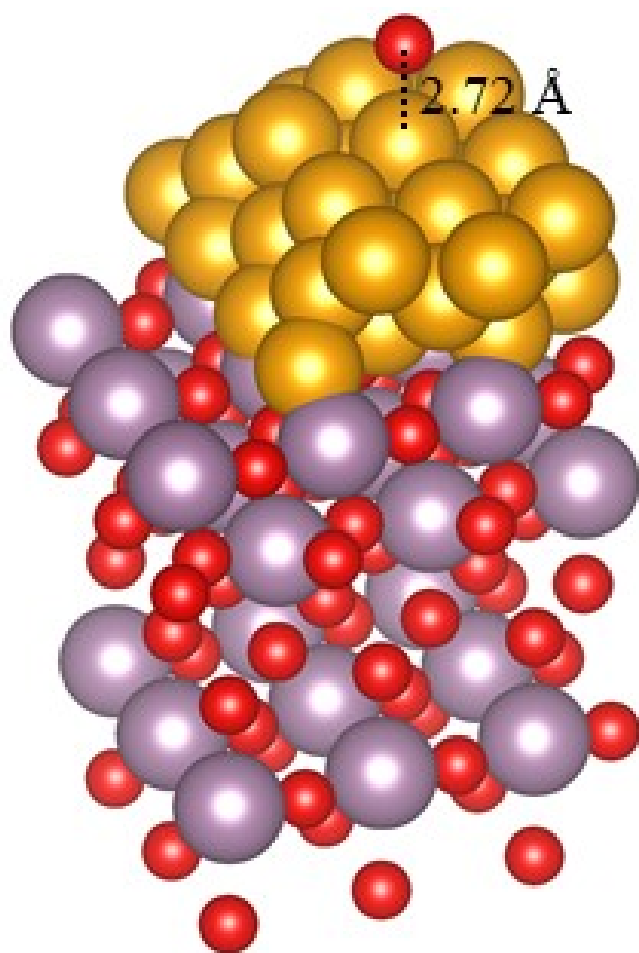

**Figure S20.** The side view of IMO's relaxed structure for the oxygen adsorbed on the site D. The red, pink, violet, grey, and rosy-brown balls represent the O, H, Co, Ni, and Ru atoms, respectively.

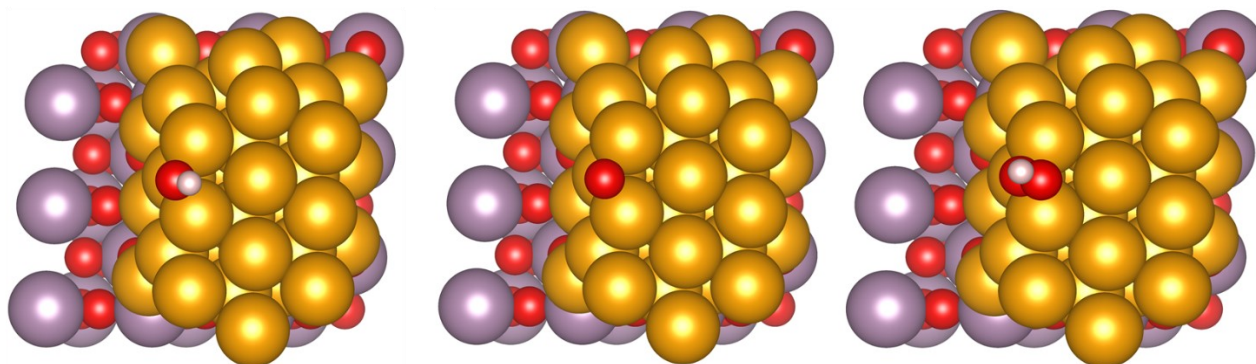

**Figure S21.**The configuration of the OER process for IMO.

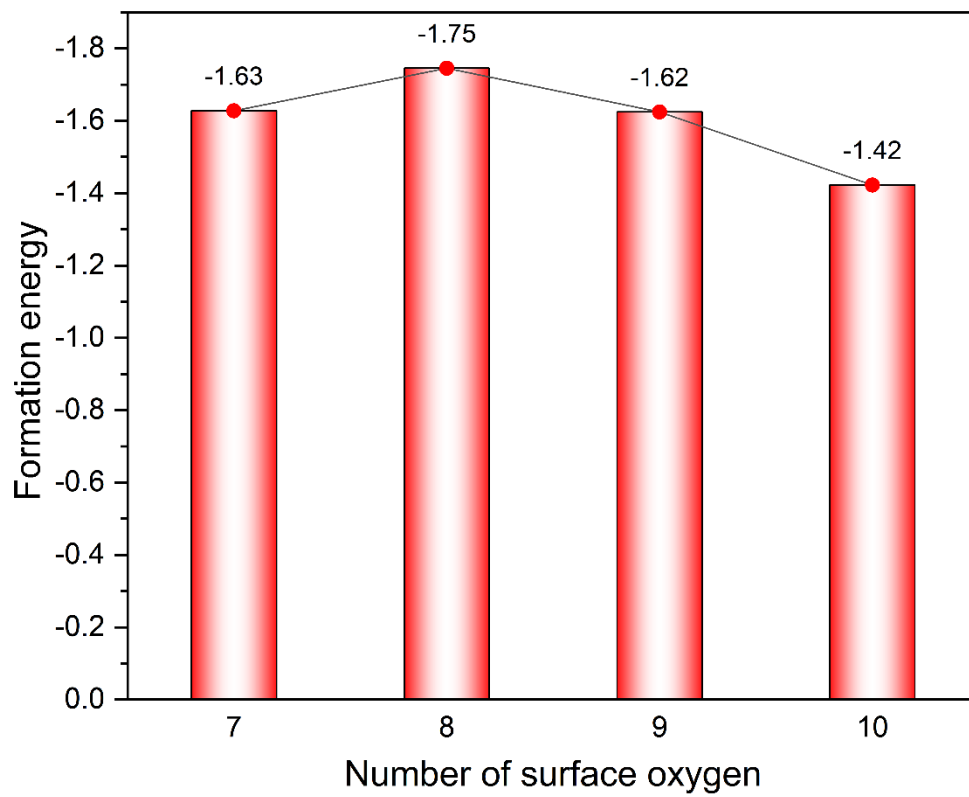

**Figure S22. The formation for various amounts of surface oxygen for IMO.**

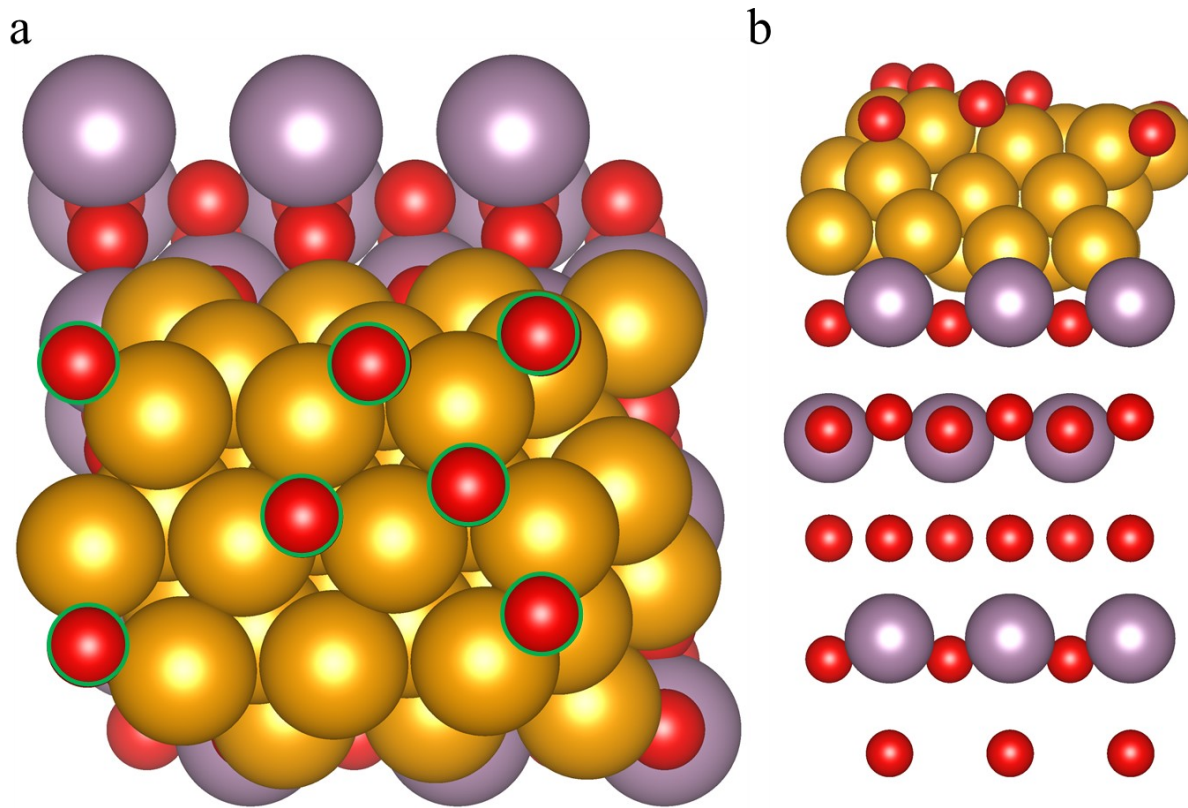

**Figure S23.** The top and side view of the IMO with 7 surface oxygen atoms.

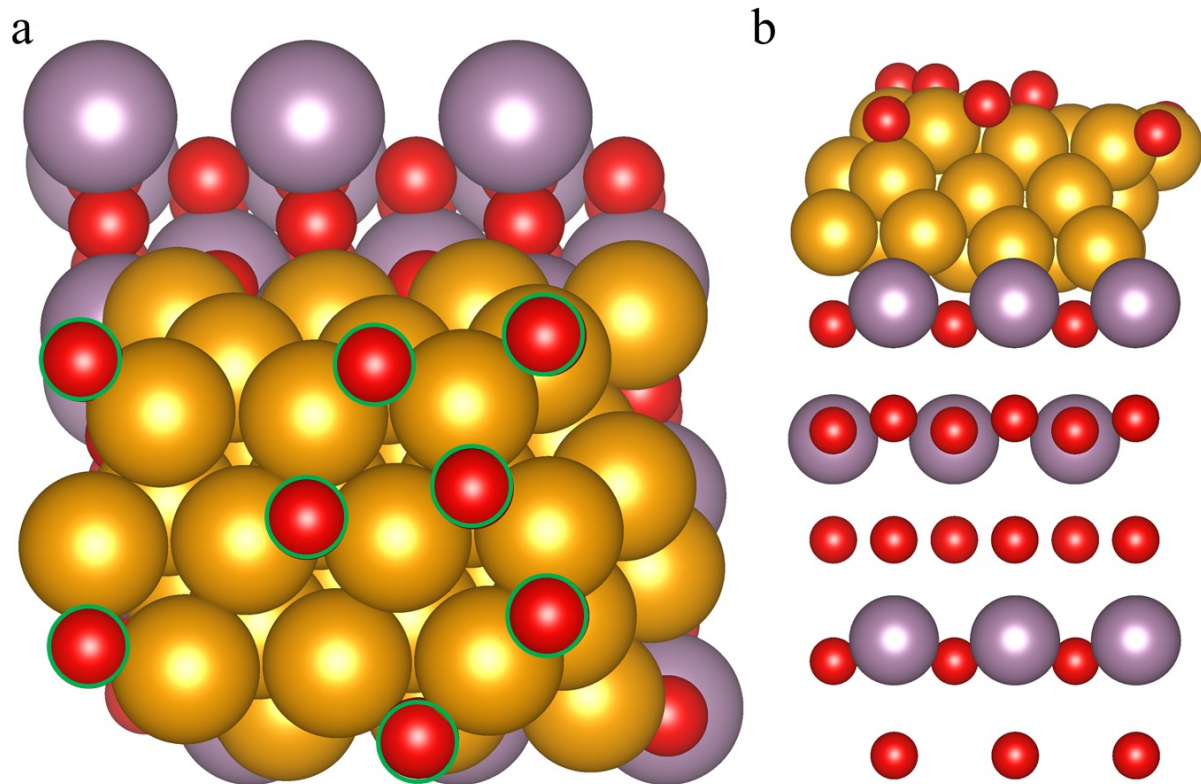

**Figure S24. The top and side view of the IMO with 8 surface oxygen atoms.**



a

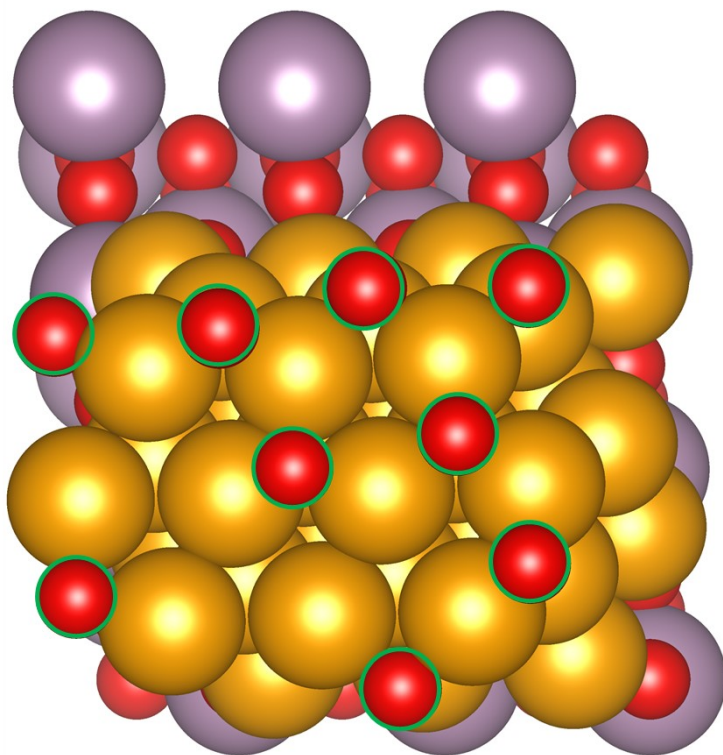

b

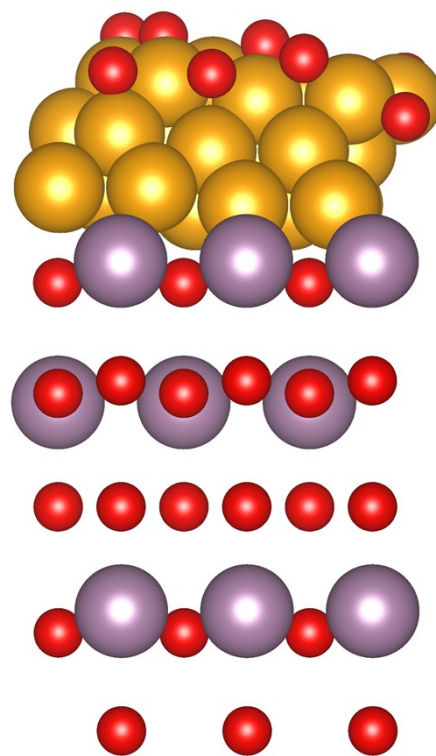

**Figure S25.** The top and side view of the IMO with 9 surface oxygen atoms.

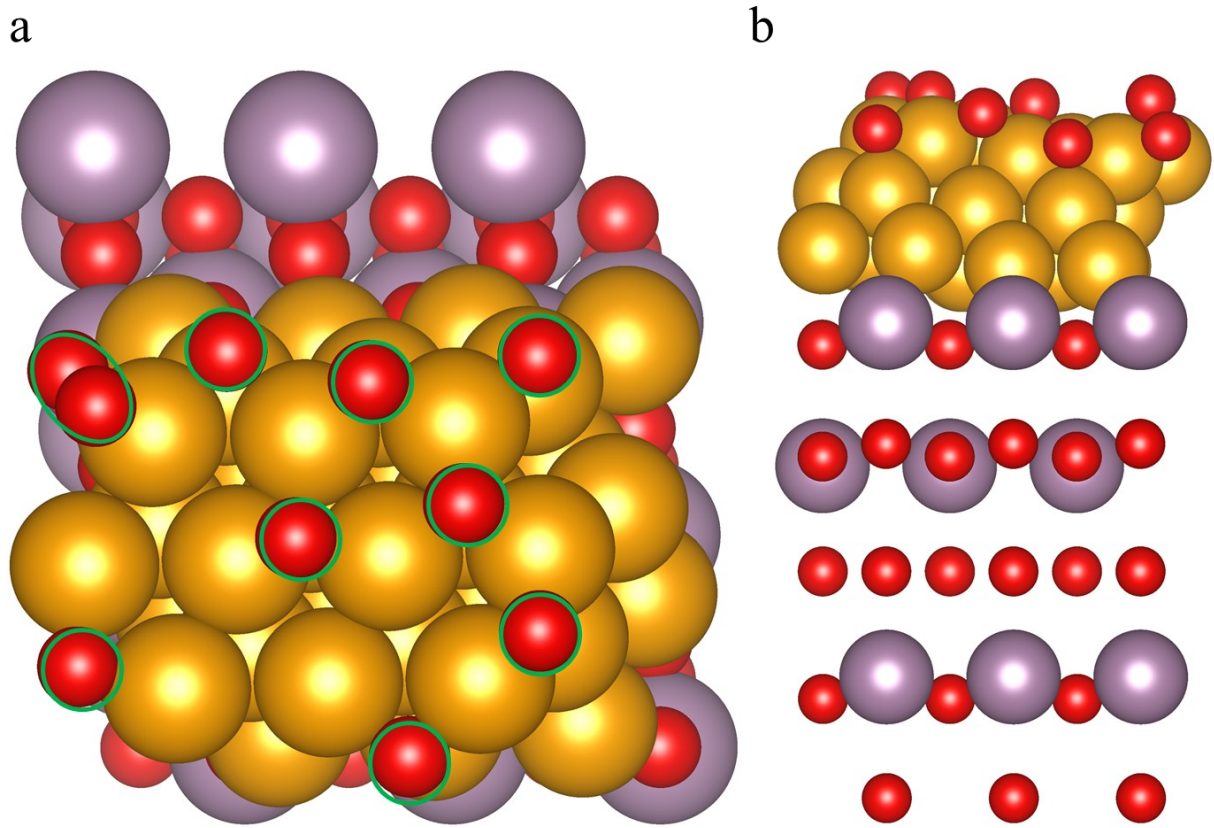

**Figure S26. The top and side view of the IMO with 10 surface oxygen atoms.**

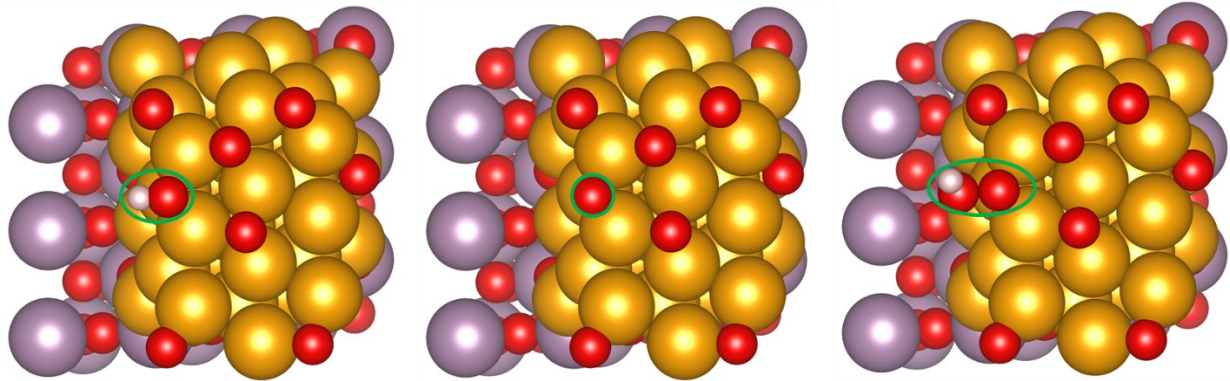

**Figure S27.**The configuration of the OER process for IMO (O-7).

**Table S1. Parameter for deconvolution of XPS spectra.**

| <b>Material</b>         | <b>Peak</b>                           | <b>Position<br/>(eV)</b> | <b>Shape<br/>(eV)</b> | <b>FWHM*<br/>(eV)</b> | <b>Peak<br/>Area</b> |
|-------------------------|---------------------------------------|--------------------------|-----------------------|-----------------------|----------------------|
| <b>IMO</b>              | Ir 4f <sub>7/2</sub>                  | 61.93                    | Gaussian              | 1.4                   | 2239.5               |
|                         | Ir 4f <sub>5/2</sub>                  | 64.84                    | Gaussian              | 1.3                   | 1710.3               |
|                         | O 1s                                  | 530.31                   | Gaussian              | 1.4                   | 11418.9              |
|                         | O 1s                                  | 531.36                   | Gaussian              | 1.4                   | 5334.9               |
|                         | O 1s                                  | 532.68                   | Gaussian              | 1.6                   | 1379.1               |
|                         | Mo <sup>5+</sup><br>3d <sub>5/2</sub> | 231.72                   | Gaussian              | 1.6                   | 2860.9               |
|                         | Mo <sup>6+</sup><br>3d <sub>5/2</sub> | 232.79                   | Gaussian              | 1.46                  | 12835.1              |
|                         | Mo <sup>5+</sup><br>3d <sub>3/2</sub> | 234.46                   | Gaussian              | 1.2                   | 1514.3               |
|                         | Mo <sup>6+</sup><br>3d <sub>3/2</sub> | 235.89                   | Gaussian              | 1.4                   | 8539.4               |
|                         | Ir 4f <sub>7/2</sub>                  | 61.55                    | Gaussian              | 1.3                   | 1181.2               |
|                         | Ir 4f <sub>5/2</sub>                  | 64.53                    | Gaussian              | 1.22                  | 917.7                |
| <b>IOMO</b>             | O 1s                                  | 530.33                   | Gaussian              | 1.5                   | 10722.1              |
|                         | O 1s                                  | 531.36                   | Gaussian              | 1.6                   | 3366.9               |
|                         | O 1s                                  | 532.66                   | Gaussian              | 1.4                   | 739.1                |
|                         | Mo <sup>5+</sup><br>3d <sub>5/2</sub> | 232.10                   | Gaussian              | 1.2                   | 805.8                |
|                         | Mo <sup>6+</sup><br>3d <sub>5/2</sub> | 232.59                   | Gaussian              | 1.3                   | 9068.9               |
|                         | Mo <sup>5+</sup><br>3d <sub>3/2</sub> | 234.18                   | Gaussian              | 1.04                  | 543.97               |
|                         | Mo <sup>6+</sup><br>3d <sub>3/2</sub> | 235.70                   | Gaussian              | 1.3                   | 6078.51              |
|                         | Ir                                    | Ir 4f <sub>7/2</sub>     | 60.93                 | Gaussian              | 1.2                  |
|                         | Ir 4f <sub>5/2</sub>                  | 63.83                    | Gaussian              | 1.23                  | 2583.7               |
| <b>IrCl<sub>3</sub></b> | Ir 4f <sub>7/2</sub>                  | 61.68                    | Gaussian              | 1.8                   | 967.8                |
|                         | Ir 4f <sub>5/2</sub>                  | 64.67                    | Gaussian              | 1.7                   | 727.1                |
| <b>IrO<sub>2</sub></b>  | Ir 4f <sub>7/2</sub>                  | 61.63                    | Gaussian              | 1.34                  | 1607.1               |
|                         | Ir 4f <sub>5/2</sub>                  | 64.56                    | Gaussian              | 1.4                   | 1204.2               |
|                         | O 1s                                  | 529.83                   | Gaussian              | 1.4                   | 1385.1               |
|                         | O 1s                                  | 531.18                   | Gaussian              | 1.8                   | 1117.2               |
|                         | O 1s                                  | 533.05                   | Gaussian              | 1.8                   | 464.95               |

**\*FWHM: Full with at half maximum.**

**Table S2.** EXAFS fitting parameters various samples

| Samples                     | Path       | Coordination number | Radial distance | Debye-Waller factor ( $\sigma^2$ ) |
|-----------------------------|------------|---------------------|-----------------|------------------------------------|
| <b>IMO-Ir metal</b>         | Ir-Ir1     | 12                  | 2.77(2)         | 0.0037(2)                          |
|                             | Ir-Ir2     | 6                   | 3.85(3)         | 0.0042(11)                         |
|                             | Ir-Ir3     | 24                  | 4.71(4)         | 0.0057(6)                          |
|                             | Ir-Ir4     | 12                  | 5.44(4)         | 0.0047(8)                          |
|                             | Ir-Ir1-Ir4 | 48                  | 5.44(4)         | 0.0047(8)                          |
| <b>IOMO-IrO<sub>2</sub></b> | Ir-O1      | 7                   | 1.95(6)         | 0.0025(3)                          |
|                             | Ir-Ir2     | 2                   | 3.12(10)        | 0.0026(14)                         |
|                             | Ir-O1      | 4                   | 3.53(6)         | 0.0025(3)                          |
|                             | Ir-Ir2     | 8                   | 3.55(4)         | 0.0044(8)                          |
| <b>IMO-MoO<sub>3</sub></b>  | Mo-O1      | 1                   | 1.65(8)         | 0.0012(8)                          |
|                             | Mo-O2      | 1                   | 1.72(8)         | 0.0012(8)                          |
|                             | Mo-O3(Ir)  | 2                   | 1.93(13)        | 0.0032(10)                         |
|                             | Mo-O4(Ir)  | 1                   | 2.28(2)         | 0.005(2)                           |
|                             | Mo-O5      | 1                   | 2.35(2)         | 0.005(2)                           |
|                             | Mo-Mo1     | 2                   | 3.38(7)         | 0.0007(8)                          |
|                             | Mo-O6      | 4                   | 3.35(8)         | 0.0012(8)                          |
|                             | Mo-Mo2     | 2                   | 3.78(1)         | 0.0007(7)                          |
|                             | Mo-Mo3     | 2                   | 4.02(1)         | 0.0007(7)                          |
| <b>IOMO-MoO<sub>3</sub></b> | Mo-O1      | 1                   | 1.66(8)         | 0.0014(8)                          |
|                             | Mo-O2      | 1                   | 1.72(8)         | 0.0014(8)                          |
|                             | Mo-O3      | 2                   | 1.93(13)        | 0.0035(15)                         |
|                             | Mo-O4      | 1                   | 2.28(3)         | 0.004(2)                           |
|                             | Mo-O5      | 1                   | 2.35(3)         | 0.004(2)                           |
|                             | Mo-Mo1     | 2                   | 3.37(9)         | 0.0012(7)                          |
|                             | Mo-O6      | 4                   | 3.35(8)         | 0.0014(8)                          |
|                             | Mo-Mo2     | 2                   | 3.77(9)         | 0.0015(12)                         |
|                             | Mo-Mo3     | 2                   | 4.00(1)         | 0.0015(12)                         |

**Radial distance:** interatomic distance (the bond length between the central atom and surrounding coordination atoms).  $\sigma^2$ : Debye-Waller factor.

**Table S3.** Faradic efficiency for OER ( $FE_{OER}$ )

| Time (min) | O <sub>2</sub> Volume (mL) | Experimental O <sub>2</sub> $\mu$ mol | Q       | Theoretical O <sub>2</sub> ( $\mu$ mol)( | $FE_{OER}$ |
|------------|----------------------------|---------------------------------------|---------|------------------------------------------|------------|
| 10         | 3.4                        | 151.786                               | 60.008  | 155.464                                  | 98.7       |
| 20         | 6.8                        | 308.036                               | 120.016 | 310.969                                  | 99.01      |
| 30         | 10.3                       | 459.821                               | 180.023 | 466.392                                  | 98.6       |
| 40         | 13.8                       | 616.071                               | 240.031 | 621.856                                  | 99.01      |

For Faradic efficiency measurement:

The Faradic efficiency was calculated using the equation.

$$\text{Faradic efficiency} = \frac{\text{experimental } \mu\text{mol of } O_2}{\text{Theoretical } \mu\text{mol of } O_2} \times 100$$

The theoretical amount of O<sub>2</sub> gas was calculated from Faraday's law:

$$n = \frac{I \times t}{z \times F}$$

$$n = \frac{Q}{z \times F}$$

where  $n$  is the number of mols,  $I$  is the current in ampere,  $t$  is the time in seconds,  $z$  is the transfer of electrons (for O<sub>2</sub>  $z=4$ ), and  $F$  is the Faraday constant (96485.3329 C mol<sup>-1</sup>).  $Q$  is charge.

**Table S4. Parameter for deconvolution of XPS spectra before/after the OER reaction for IMO and IOMO.**

| <b>Material</b>                       | <b>Peak</b>                           | <b>Position (eV)</b> | <b>Shape (eV)</b> | <b>FWHM* (eV)</b> | <b>Peak Area</b> |
|---------------------------------------|---------------------------------------|----------------------|-------------------|-------------------|------------------|
| IMO                                   | Ir 4f <sub>7/2</sub>                  | 61.93                | Gaussian          | 1.4               | 2239.5           |
|                                       | Ir 4f <sub>5/2</sub>                  | 64.84                | Gaussian          | 1.3               | 1710.3           |
|                                       | O 1s                                  | 530.31               | Gaussian          | 1.4               | 11418.9          |
|                                       | O 1s                                  | 531.36               | Gaussian          | 1.4               | 5334.9           |
|                                       | O 1s                                  | 532.68               | Gaussian          | 1.6               | 1379.1           |
|                                       | Mo <sup>5+</sup><br>3d <sub>5/2</sub> | 231.72               | Gaussian          | 1.6               | 2860.9           |
|                                       | Mo <sup>6+</sup><br>3d <sub>5/2</sub> | 232.79               | Gaussian          | 1.46              | 12835.1          |
|                                       | Mo <sup>5+</sup><br>3d <sub>3/2</sub> | 234.46               | Gaussian          | 1.2               | 1514.3           |
|                                       | Mo <sup>6+</sup><br>3d <sub>3/2</sub> | 235.89               | Gaussian          | 1.4               | 8539.4           |
|                                       | Used IMO                              | Ir 4f <sub>7/2</sub> | 62.64             | Gaussian          | 1.7              |
| Ir 4f <sub>5/2</sub>                  |                                       | 65.64                | Gaussian          | 1.74              | 268.82           |
| O 1s                                  |                                       | 530.54               | Gaussian          | 1.5               | 11838.4          |
| O 1s                                  |                                       | 531.36               | Gaussian          | 1.4               | 2753.67          |
| O 1s                                  |                                       | 532.46               | Gaussian          | 1.45              | 1139.73          |
| Mo <sup>5+</sup><br>3d <sub>5/2</sub> |                                       | 231.94               | Gaussian          | 1.5               | 741.41           |
| Mo <sup>6+</sup><br>3d <sub>5/2</sub> |                                       | 233.24               | Gaussian          | 1.5               | 1879.54          |
| Mo <sup>5+</sup><br>3d <sub>3/2</sub> |                                       | 234.60               | Gaussian          | 1.4               | 498.31           |
| Mo <sup>6+</sup><br>3d <sub>3/2</sub> |                                       | 236.23               | Gaussian          | 1.8               | 1262.28          |
| IOMO                                  |                                       | Ir 4f <sub>7/2</sub> | 61.55             | Gaussian          | 1.3              |
|                                       | Ir 4f <sub>5/2</sub>                  | 64.53                | Gaussian          | 1.22              | 917.7            |
|                                       | O 1s                                  | 530.33               | Gaussian          | 1.5               | 10722.1          |
|                                       | O 1s                                  | 531.36               | Gaussian          | 1.6               | 3366.9           |
|                                       | O 1s                                  | 532.66               | Gaussian          | 1.4               | 739.1            |
|                                       | Mo <sup>5+</sup><br>3d <sub>5/2</sub> | 232.10               | Gaussian          | 1.2               | 805.8            |
|                                       | Mo <sup>6+</sup><br>3d <sub>5/2</sub> | 232.59               | Gaussian          | 1.3               | 9068.9           |
|                                       | Mo <sup>5+</sup><br>3d <sub>3/2</sub> | 234.18               | Gaussian          | 1.04              | 543.97           |

|              |                                       |        |          |      |         |
|--------------|---------------------------------------|--------|----------|------|---------|
|              | Mo <sup>6+</sup><br>3d <sub>3/2</sub> | 235.70 | Gaussian | 1.3  | 6078.51 |
|              | Ir 4f <sub>7/2</sub>                  | 62.51  | Gaussian | 1.6  | 1499.94 |
|              | Ir 4f <sub>5/2</sub>                  | 65.38  | Gaussian | 1.4  | 1127.94 |
|              | O 1s                                  | 530.57 | Gaussian | 1.4  | 1829.78 |
|              | O 1s                                  | 531.70 | Gaussian | 1.6  | 4796.47 |
|              | O 1s                                  | 532.83 | Gaussian | 1.4  | 6277    |
| Used<br>IOMO | Mo <sup>5+</sup><br>3d <sub>5/2</sub> | 232.54 | Gaussian | 1.4  | 424.23  |
|              | Mo <sup>6+</sup><br>3d <sub>5/2</sub> | 233.27 | Gaussian | 1.24 | 2217.66 |
|              | Mo <sup>5+</sup><br>3d <sub>3/2</sub> | 234.45 | Gaussian | 1.2  | 280.78  |
|              | Mo <sup>6+</sup><br>3d <sub>3/2</sub> | 236.41 | Gaussian | 1.34 | 1476.57 |

#### References:

1. Yu F, *et al.* High-performance bifunctional porous non-noble metal phosphide catalyst for overall water splitting. *Nature Communications* **9**, 2551 (2018).
